# Supplementary material for: Effect of nanoparticle composition on oxygen reduction reaction activity of Fe/N–C catalysts: a comparative study
Source: Royal Society of Chemistry journal article supplement (doi:10.1039/c8cy02385a), 2018-12-20
Supplement: c8cy02385a1.pdf [file c8cy02385a1.pdf]

## Electronic Supplementary Information

# Effect of nanoparticle composition on oxygen reduction reaction activity of Fe/N-C catalysts: a comparative study

Xiaoqin Huang,<sup>a</sup> Xiuju Wu,<sup>a</sup> Yanli Niu,<sup>a</sup> Chunlong Dai,<sup>a</sup> Maowen Xu,<sup>a</sup> and Weihua Hu<sup>\*a</sup>

Institute for Clean energy & Advanced Materials, Faculty of Materials & Energy,  
Southwest University, Chongqing 400715, China; Chongqing Key Laboratory for  
Advanced Materials and Technologies of Clean Energies, Chongqing 400715, China

\* Corresponding author. E-mail: whhu@swu.edu.cn (W. H. Hu)

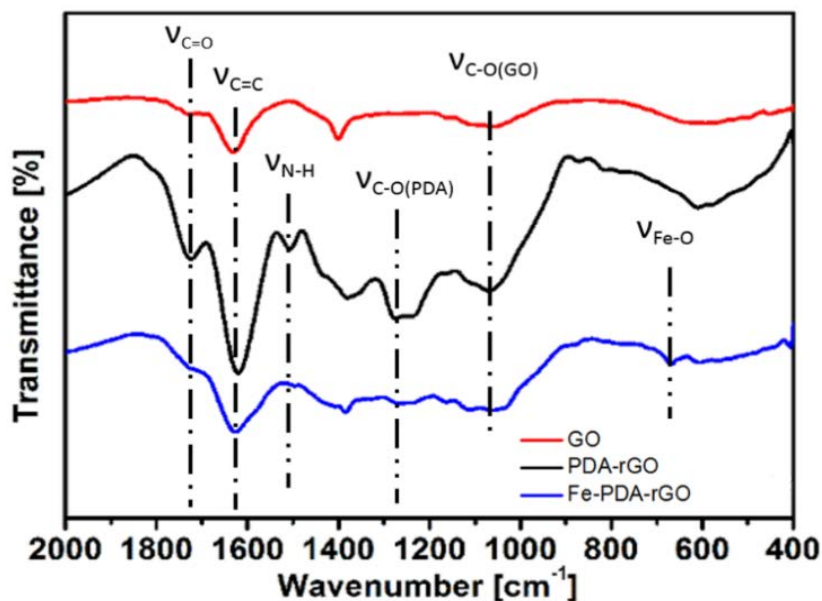

**Fig. S1** FTIR spectra of GO, PDA-rGO and Fe-PDA-rGO. The characteristic adsorption bands of GO ( $1634$ ,  $1057$  and  $1729$   $\text{cm}^{-1}$ ) and PDA ( $1509$   $\text{cm}^{-1}$ ) could be observed in the Fe-PDA-rGO precursor. The peak at  $670$   $\text{cm}^{-1}$  corresponds to the Fe-O bond, indicating the coordination between Fe ion and catechol group in Fe-PDA-rGO precursor.

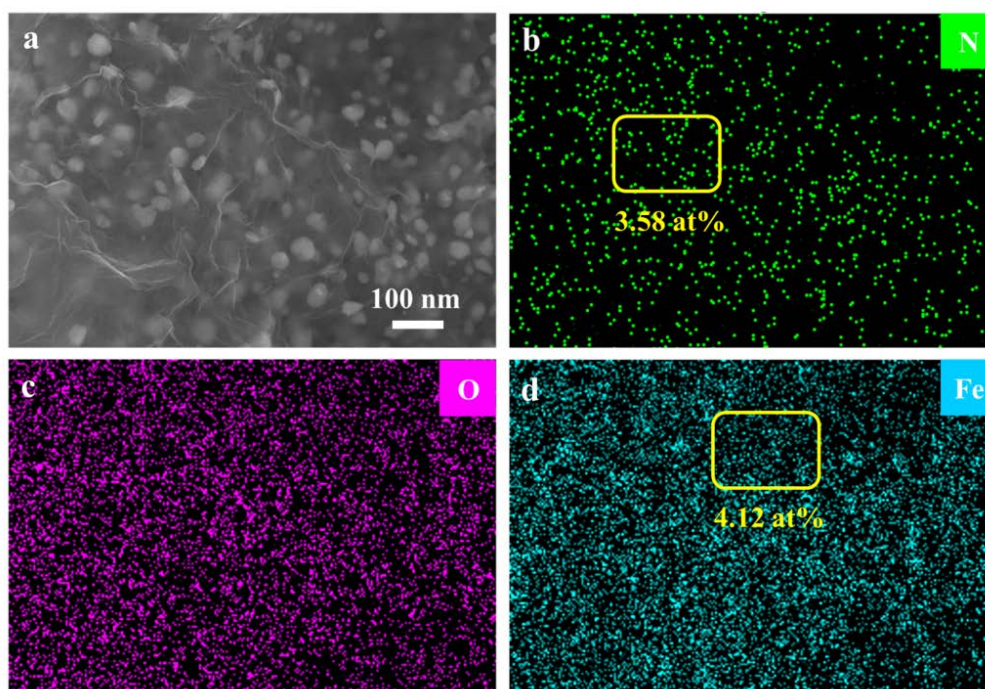

**Fig. S2** SEM image (a) and corresponding N (b), O (c) and Fe (d) EDS mapping images of Fe/Fe<sub>3</sub>O<sub>4</sub>@N-G.

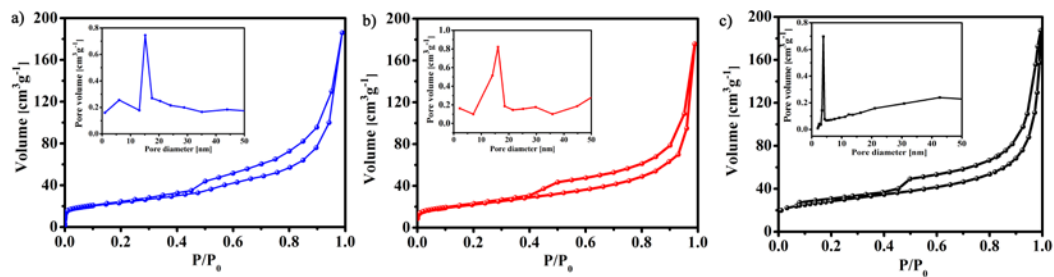

**Fig. S3** Nitrogen sorption isotherm plot (inset: BJH pore size distribution) of  $\text{Fe}_x\text{N@N-G}$  (a),  $\text{Fe/Fe}_3\text{O}_4\text{@N-G}$  (b), and  $\text{Fe}_3\text{C@N-G}$  (c).

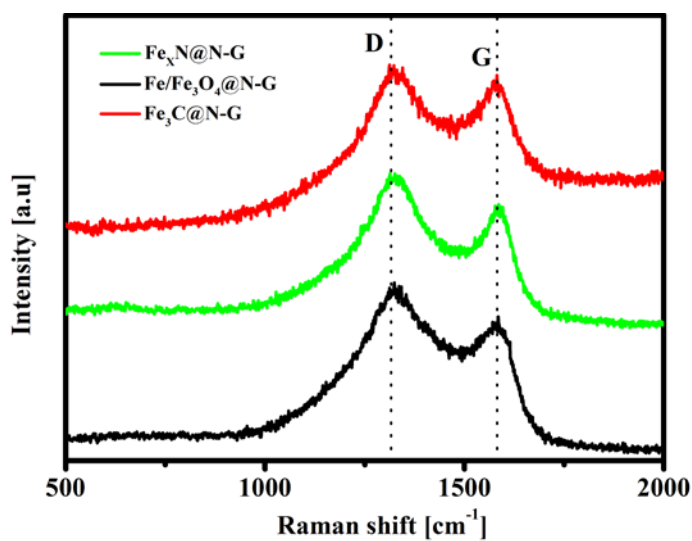

**Fig. S4** Raman spectra of three catalysts.

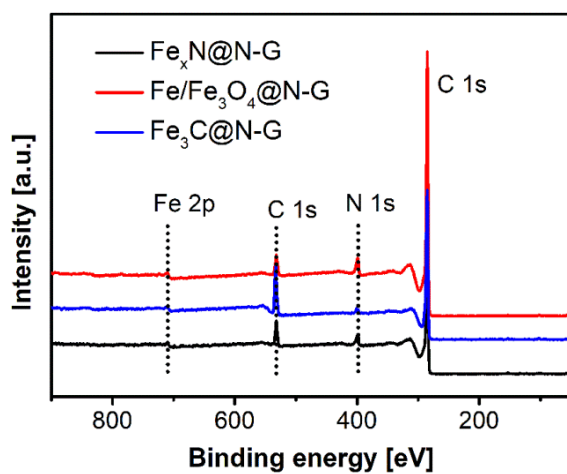

**Fig. S5** XPS survey spectrum (a) and Fe 2p (b) spectra of three catalysts.

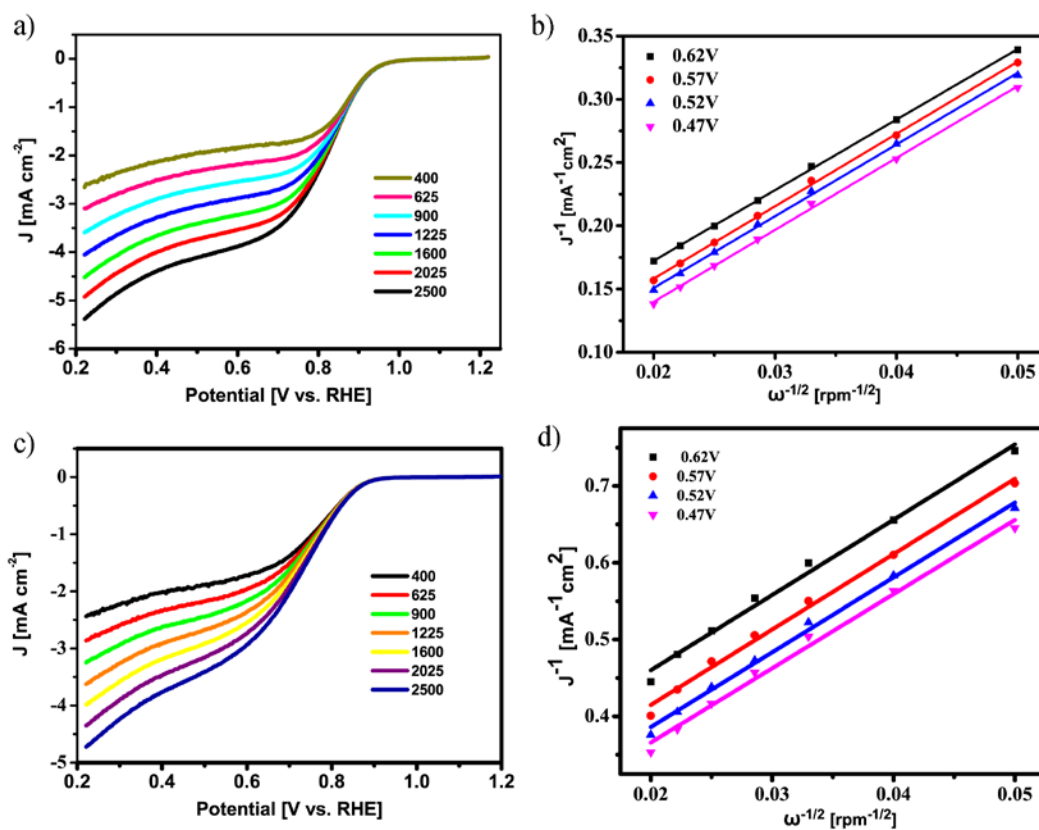

**Fig. S6** LSV curves at different rotating rates and corresponding  $K$ - $L$  plots of  $\text{Fe}_x\text{N@N-G}$  (a, b) and  $\text{Fe}_3\text{C@N-G}$  (c, d).

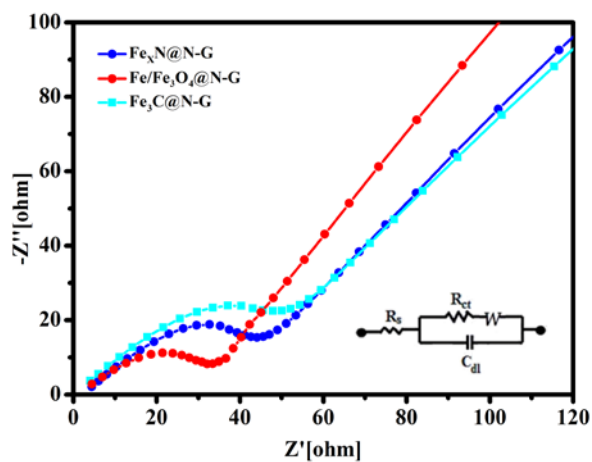

**Fig. S7** EIS of three catalysts at a potential of 0.90 V (vs. RHE). Inset shows the electrical equivalent circuit used to simulate the Nyquist plots, where  $R_s$  is the electrolyte resistance,  $R_{ct}$  is the charge-transfer resistance, and  $C_{dl}$  represents the double-layer capacitance.

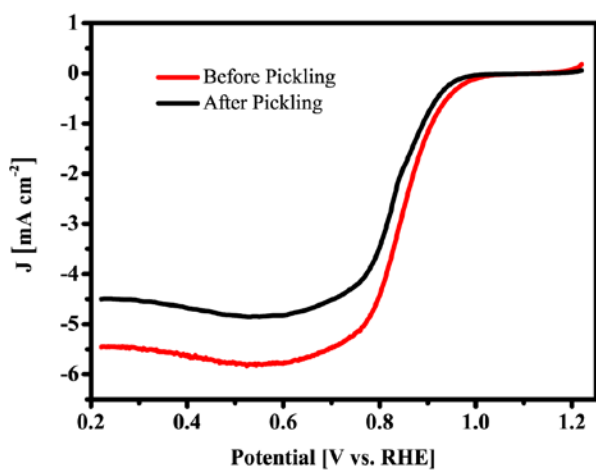

**Fig. S8** LSV curves of Fe/Fe<sub>3</sub>O<sub>4</sub>@N-G before and after pickling at a rotation rate of 1600 rpm and sweep rate of 5 mV s<sup>-1</sup>.

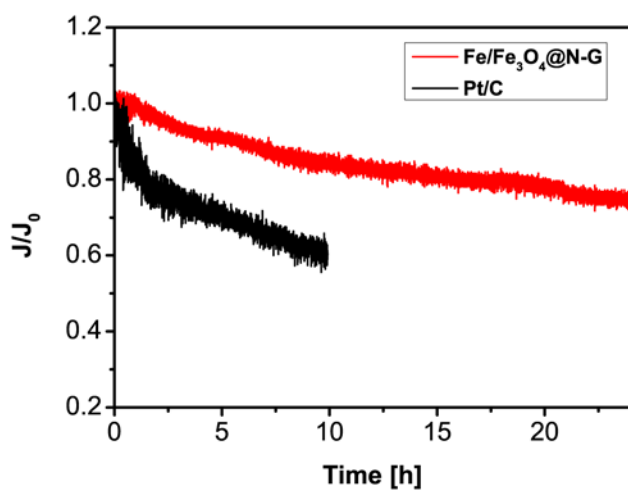

**Fig. S9** Amperometric curves of Fe/Fe<sub>3</sub>O<sub>4</sub>@N-G and commercial Pt/C at 0.69 V (vs. RHE) in O<sub>2</sub>-saturated 0.1 M KOH solution. J<sub>0</sub> is defines as the initial current density.

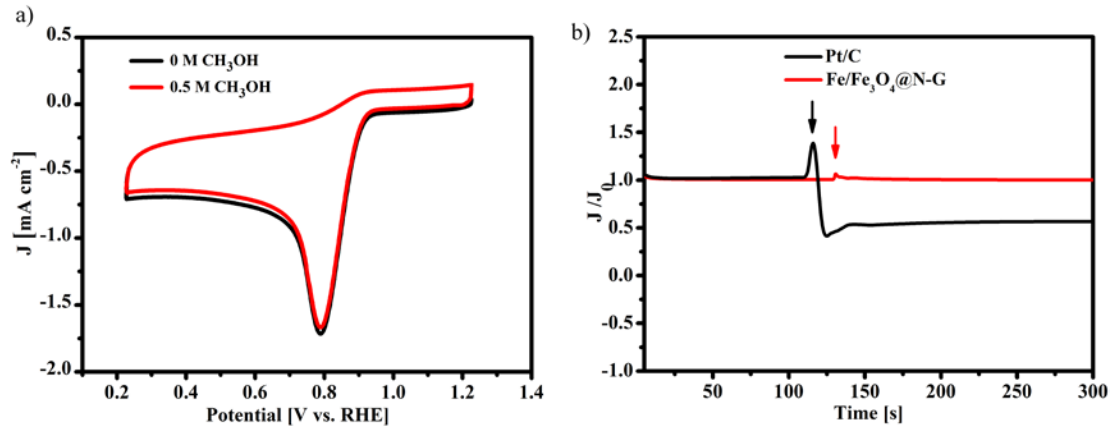

**Fig. S10** (a) CV curves of Fe/Fe<sub>3</sub>O<sub>4</sub>@N-G in O<sub>2</sub>-saturated 0.1 M KOH solution with and without methanol; (b) amperometric curves of Fe/Fe<sub>3</sub>O<sub>4</sub>@N-G and commercial Pt/C at 0.69 V (vs. RHE) in O<sub>2</sub>-saturated 0.1 M KOH solution. The arrows indicate the addition of 0.5 M methanol into the electrolyte.
